# Supplementary material for: Solid-state transformation of aqueous to organic electrolyte – Enhancing the operating voltage window of ‘in situ electrolyte’ supercapacitors
Source: Royal Society of Chemistry journal article supplement (doi:10.1039/d0se00180e), 2020-01-01
Supplement: d0se00180e1.pdf [file d0se00180e1.pdf]

## Supporting Information

### Solid-state transformation of aqueous to organic electrolyte - Enhancing the operating voltage window of 'in situ electrolyte' supercapacitors

Desirée Leistenschneider,<sup>†a</sup> Lars Henning Heß,<sup>†b</sup> Andrea Balducci,<sup>b\*</sup> and Lars Borchardt<sup>c\*</sup>

**Tab. S1:** Elemental composition of Carb<sub>KTFSI</sub> via elemental analysis.

|                       | C / wt. % | H / wt. % | N / wt. % | S / wt. % |
|-----------------------|-----------|-----------|-----------|-----------|
| Carb <sub>KTFSI</sub> | 81.62     | 0.22      | 3.21      | n.d.      |

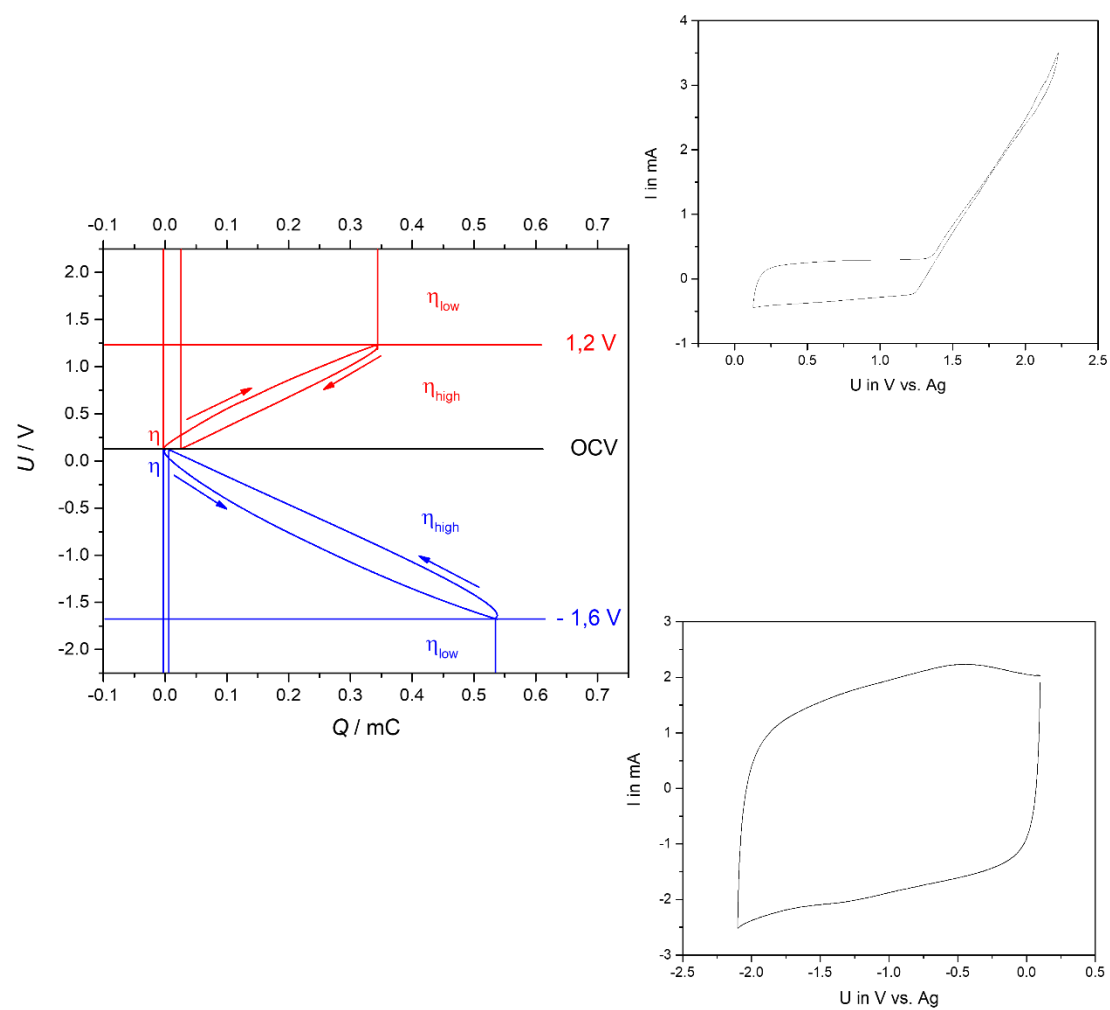

**Fig. S1** Operative voltage of the of the electrodes. At 1.2 V vs. Ag strong anodic dissolution occurs, while the negative electrode is very stable.

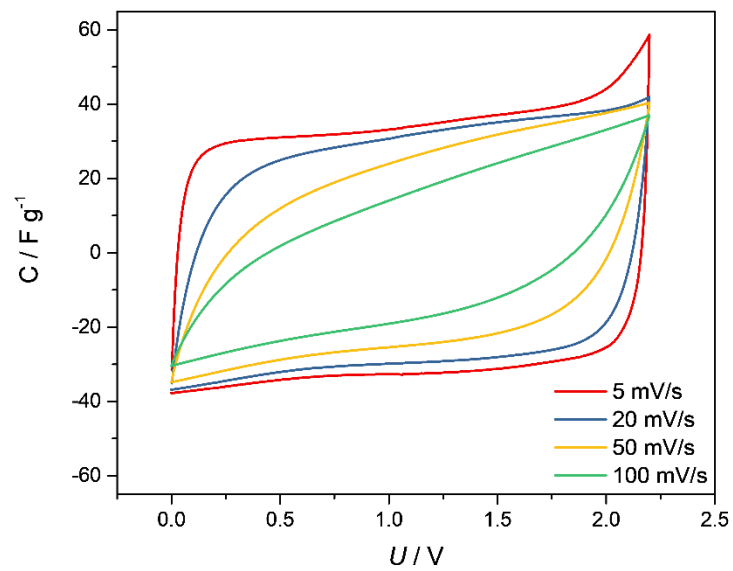

**Fig. S2** Reference electrode with washed carbon (RefSC<sub>wet</sub>) and 0.5 M KTFSl in ACN as electrolyte.

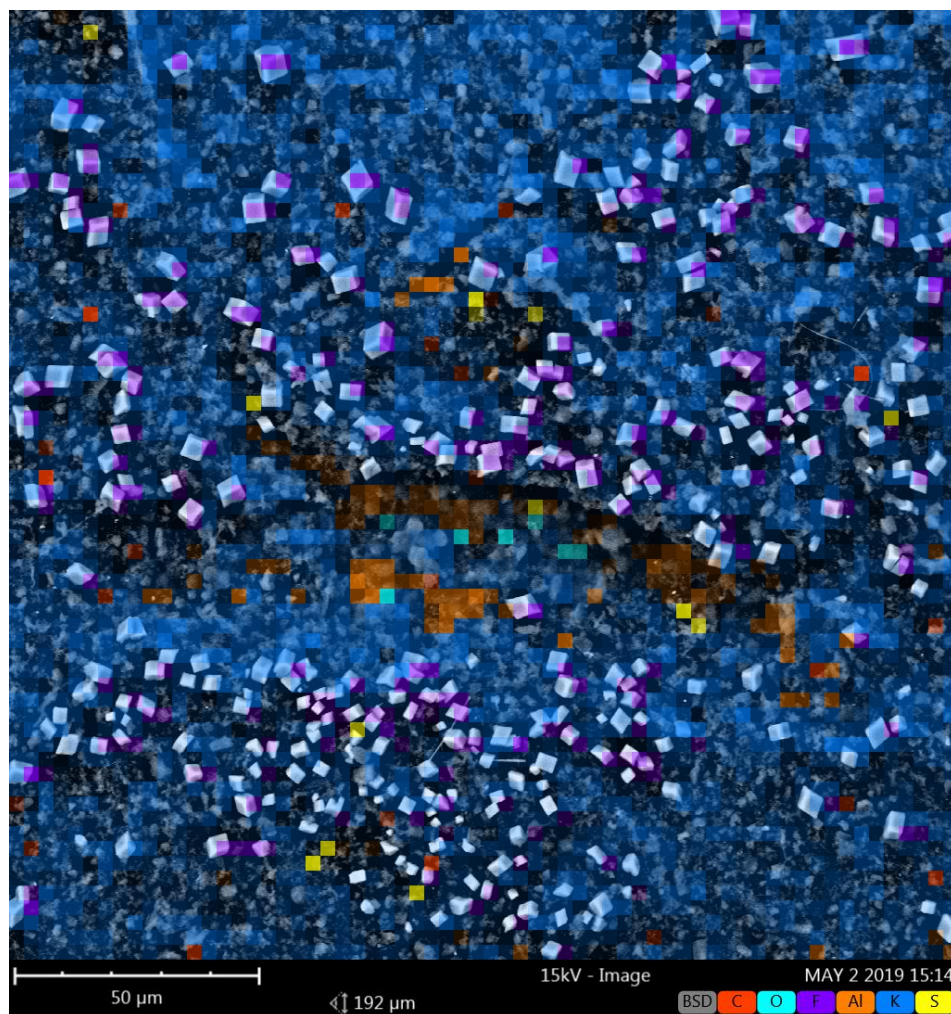

**Fig. S3** EDS Spectrum of the cycled  $C_{KTFSI}$ -Electrode.

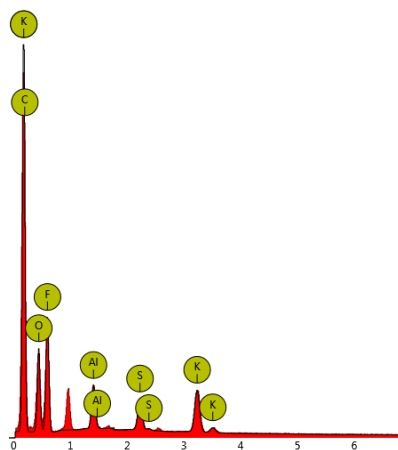

**Fig. S4** Elemental distribution of the cycled  $C_{KTFSI}$ -electrode

**Tab. S2:** Elemental distribution of the cycled  $C_{KTFSI}$ -electrode

| Element Number | Element Symbol | Element Name | Atomic Concentration | Error |
|----------------|----------------|--------------|----------------------|-------|
| 6              | C              | Carbon       | 63.9                 | 0.8   |
| 9              | F              | Fluorine     | 15.3                 | 0.1   |
| 8              | O              | Oxygen       | 18.0                 | 0.4   |
| 19             | K              | Potassium    | 1.1                  | 0.3   |
| 13             | Al             | Aluminium    | 1.1                  | 0.0   |
| 16             | S              | Sulfur       | 0.7                  | 0.2   |

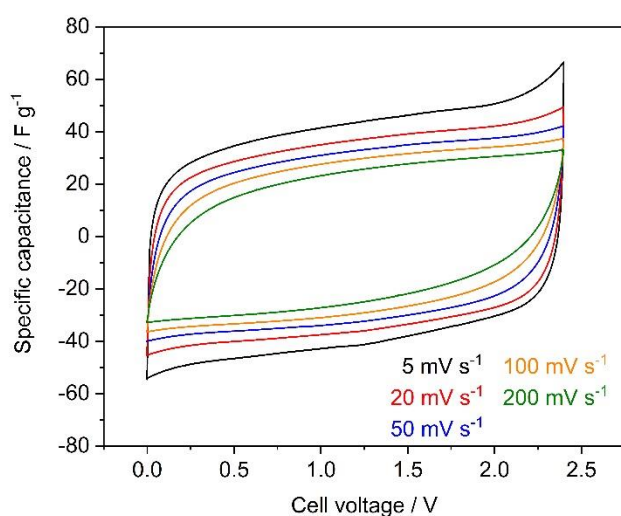

**Fig.S5** Cyclic voltammogram of  $ISC_{Wet}$  at different scan rates.

**Tab. S3:** Specific Energy and Power for  $ISC_{Wet}$ .

| Rate                 | Specific Capacitance  | Specific Energy         | Specific Power           |
|----------------------|-----------------------|-------------------------|--------------------------|
| $1 \text{ A g}^{-1}$ | $38 \text{ F g}^{-1}$ | $23 \text{ Wh kg}^{-1}$ | $1000 \text{ W kg}^{-1}$ |

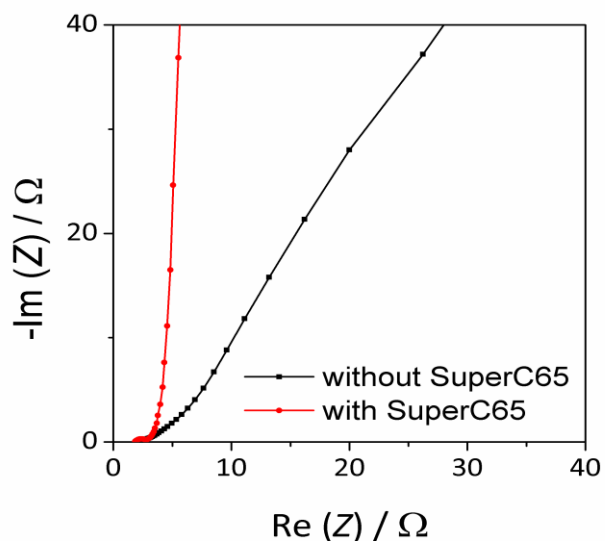

**Fig. S6** Nyquist plot of the dry-processed electrode with conductive additive and without.

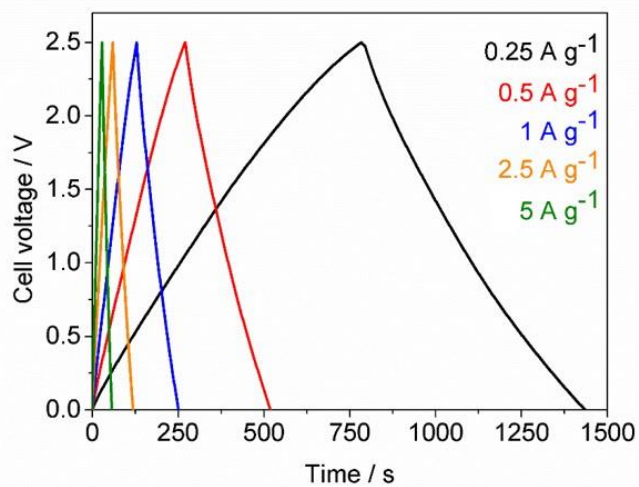

**Fig. S7** GCPL curves of ISC<sub>Dry</sub> at specific currents.

### Water content in the electrodes

In order to assess the soluble water content of the electrode, Karl-Fischer titration was applied to pure pre-dried ACN. The water content within the ACN was below 1 ppm water. Electrodes were then soaked into 150  $\mu\text{L}$  of this reference ACN. The water content in the ACN was still below 1 ppm of water. There may be still traces of water in the electrodes, however if there are traces, these traces are not be soluble in the electrolyte and could potentially stay at the carbon surface.

### BET-Surface Area of the electrode

The washed electrode including the aluminium current collector exhibits a surface area of 580  $\text{m}^2/\text{g}$ . The non-washed electrode shows a surface area below 1  $\text{m}^2/\text{g}$ .

### TGA analysis of water and KTFSI in the electrodes

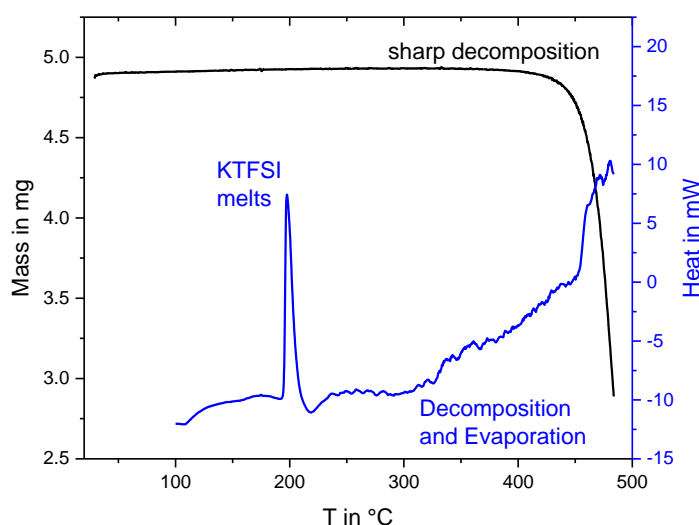

**Fig. S8** TGA/DTA of pure KTFSI. The salt melts at 200°C and decomposes at around 400°C.

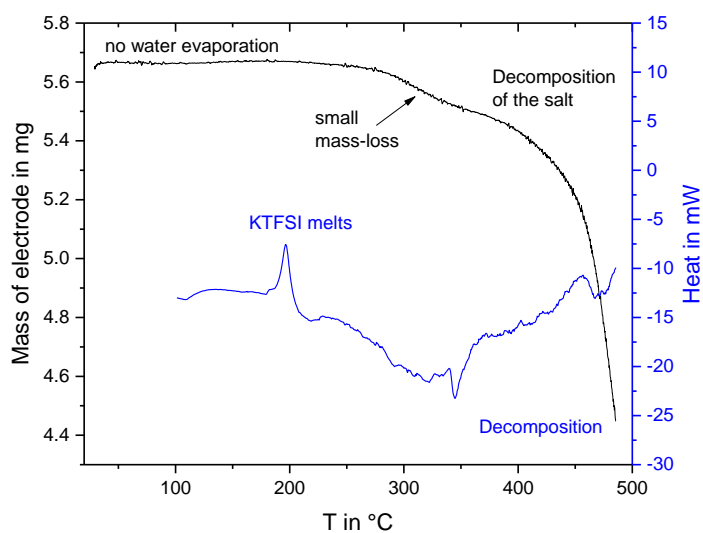

**Fig. S9** TGA/DTA of the composite electrodes containing KTFSI. The salt KTFSI melts at 200°C and decomposes at around 400°C. At 300°C there is a very small mass loss. However, the DTA signal shows an exothermic peak here, indicating decomposition of the carbon surface.

#### Additional electrode morphology measurements:

##### KTFSI containing sample

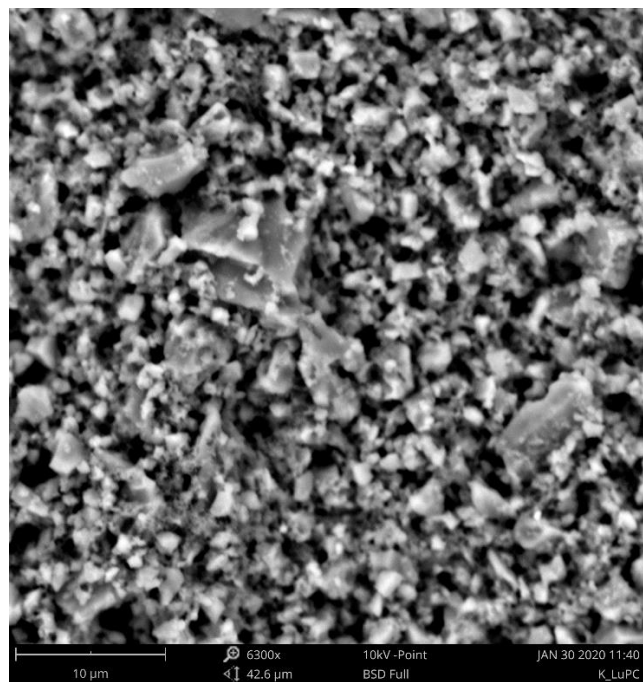

**Fig. S10** SEM of the wet-processed electrodes containing KTFSI.

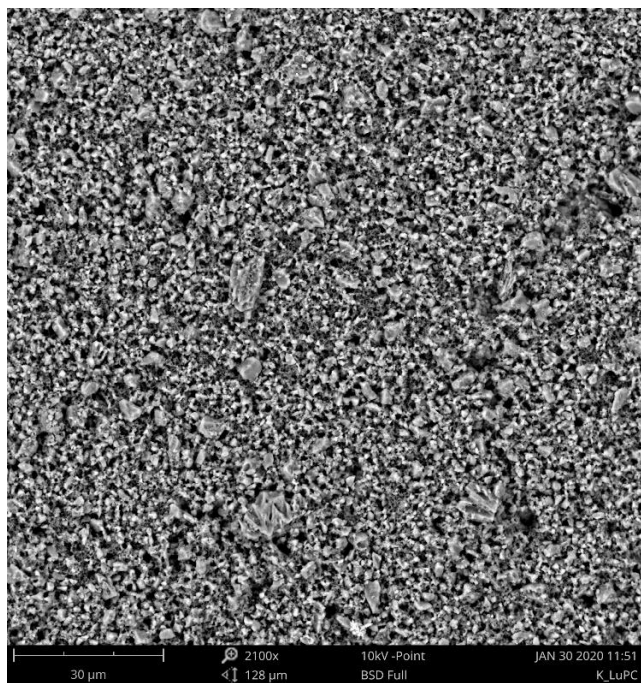

**Fig. S11** SEM of the wet-processed electrodes containing KTFSI.

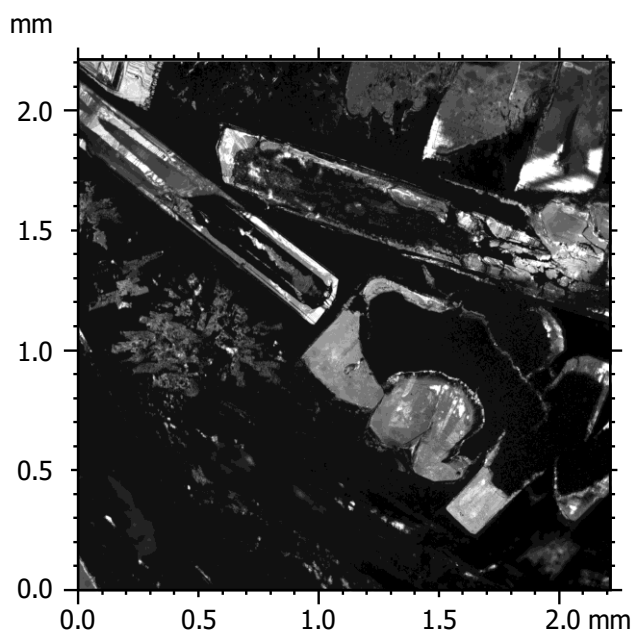

**Fig. S12** Microscope image of a crystal growing out of a wet-processed electrode and building a crystalline surface on top of the electrode

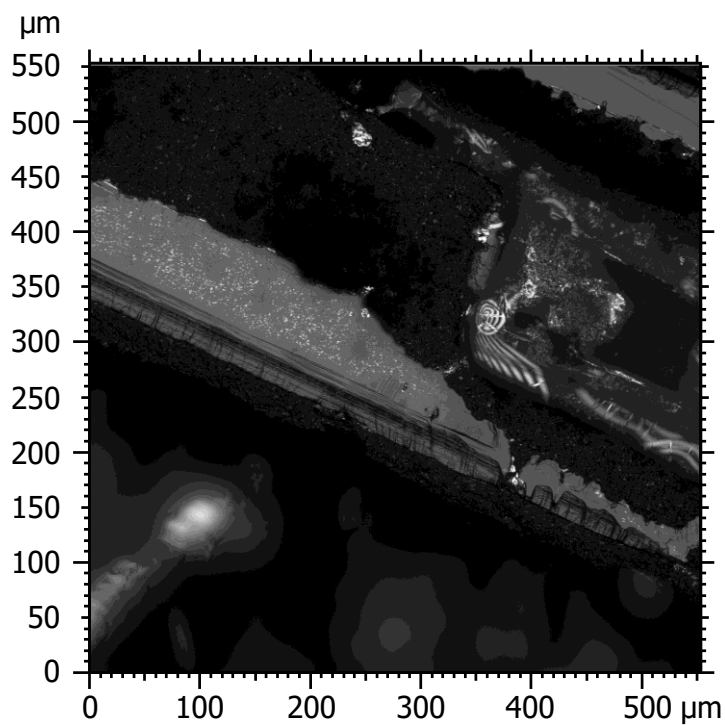

**Fig. S13** Microscope image of a crystal growing out of a wet-processed electrode and building a crystalline surface on top of the electrode, showing carbon particles underneath the outer crystal layer

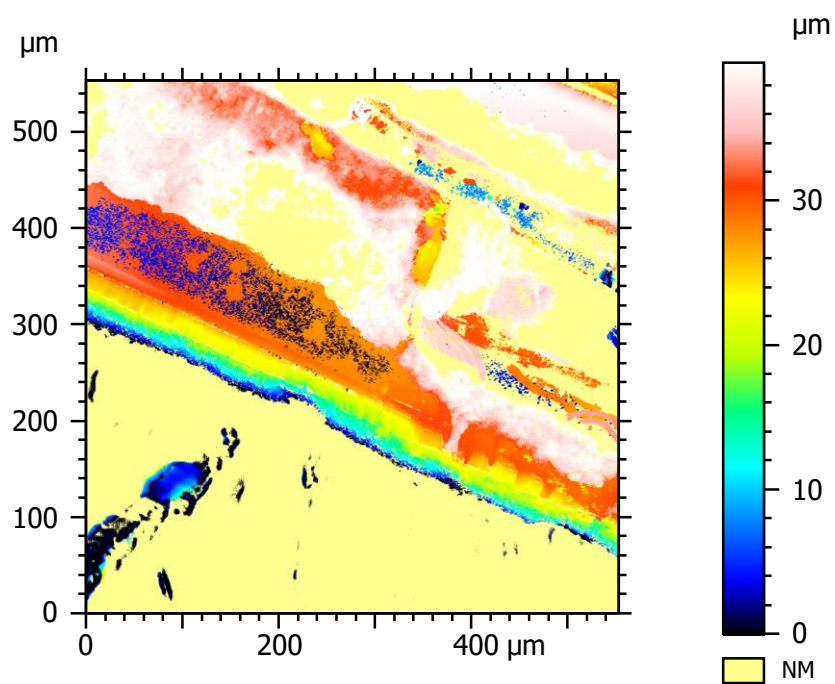

**Fig. S14** High Contrast, coloured microscope image of a crystal growing out of the wet-processed electrode and building a crystalline surface on top of the electrode, showing carbon particles underneath the outer crystal layer

Washed carbon sample:

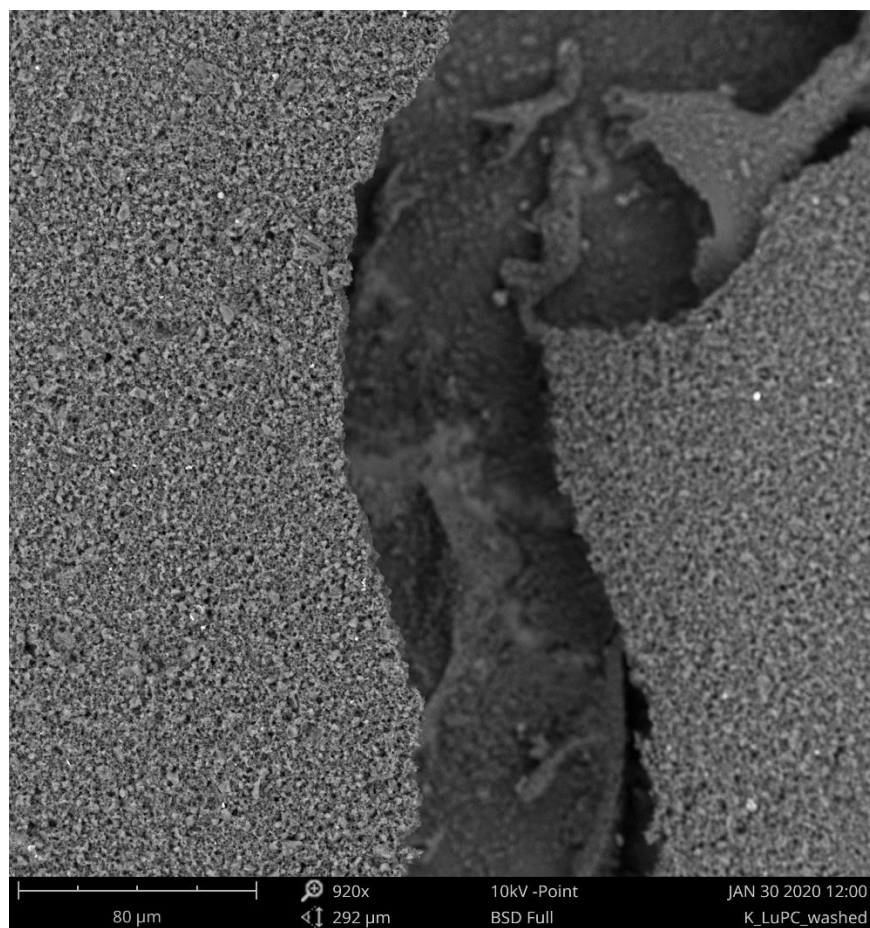

**Fig. S15** SEM image of the washed wet-processed carbon electrode showing a groove, where a crystal grew before.

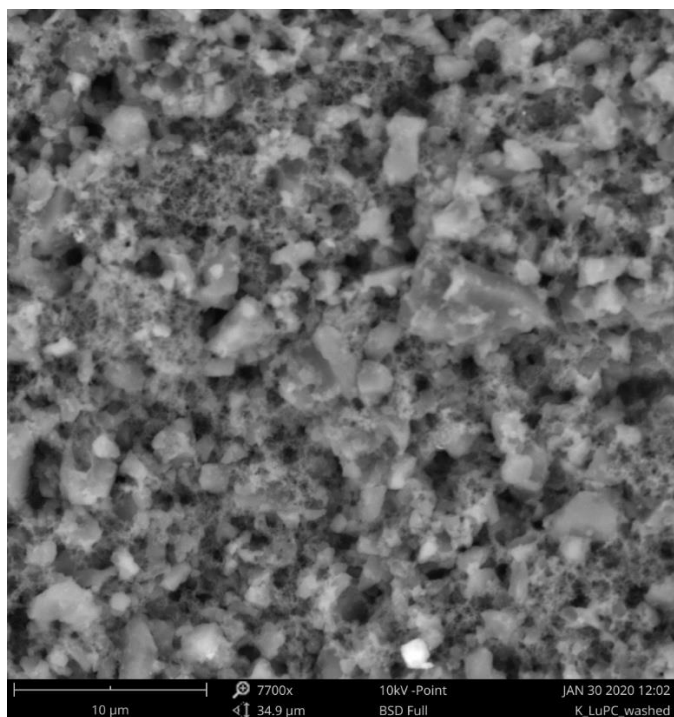

**Fig. S16** SEM image of the washed wet-processed carbon surface.

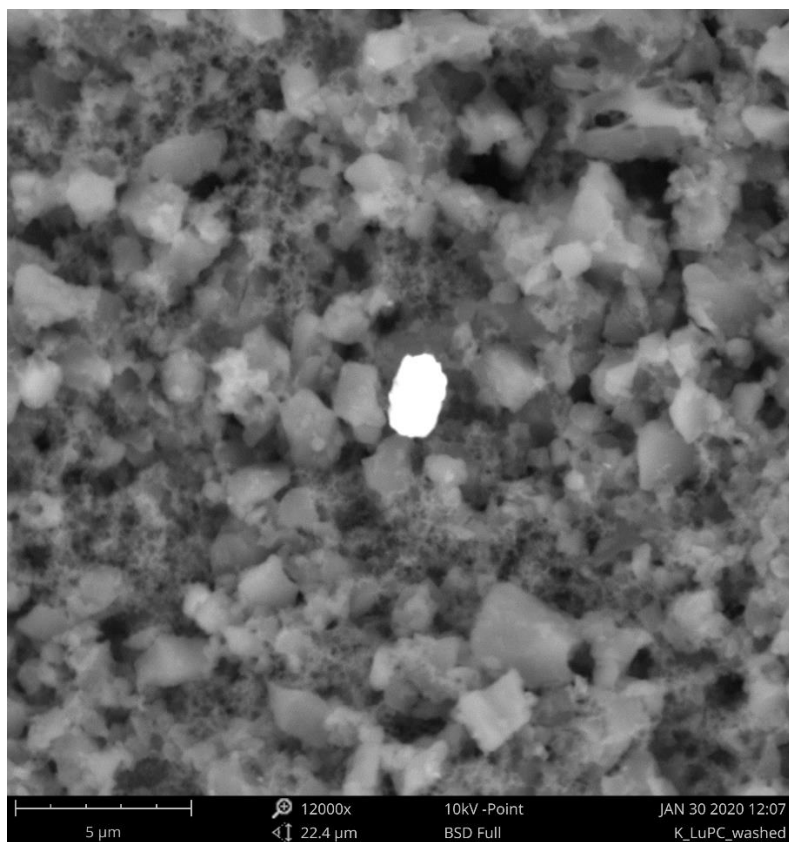

**Fig. S17** SEM image of the washed wet-processed carbon surface with a residual KTFSI crystal.

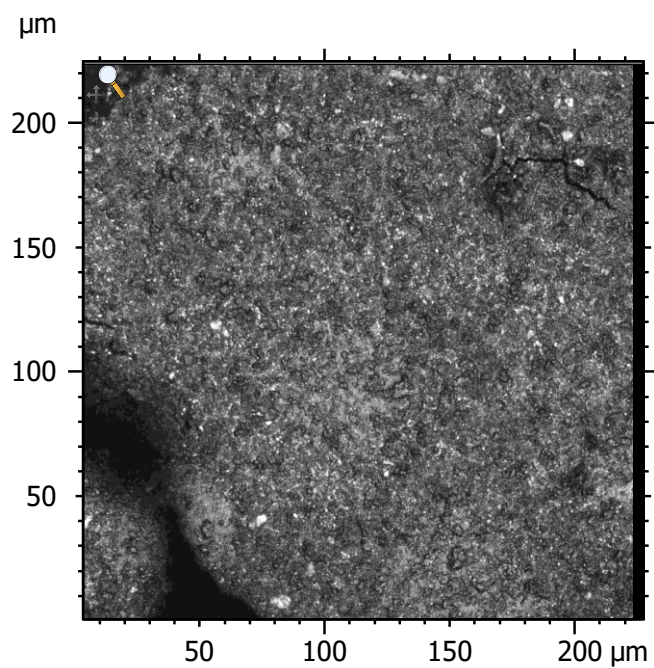

**Fig. S18** Microscope image of the washed wet-processed carbon surface.

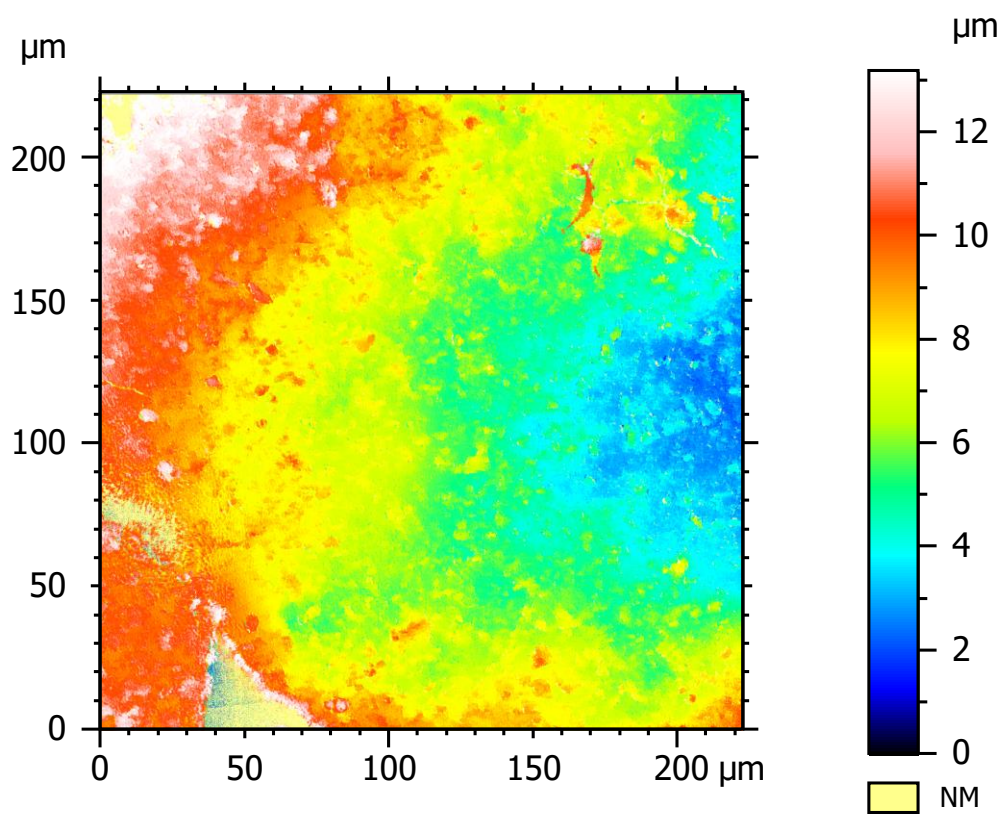

**Fig. S19** Microscopy profiling of the washed wet-processed carbon surface.

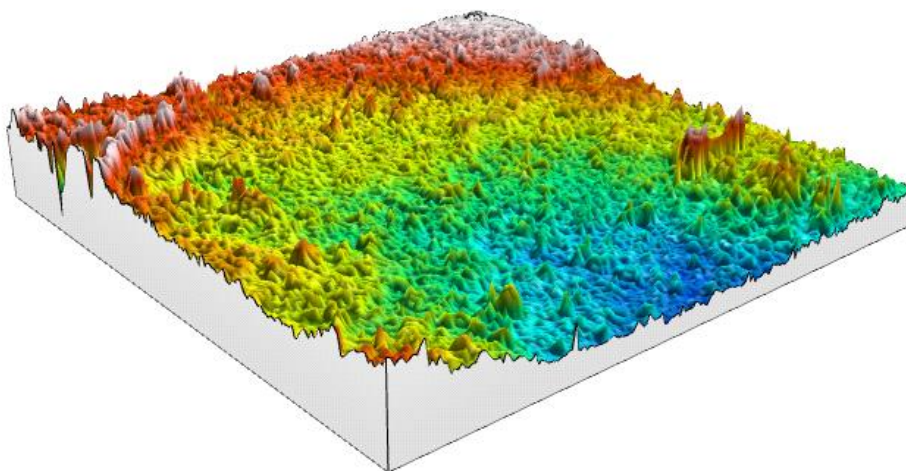

**Fig. S20** 3D Visualization of the washed wet-processed carbon surface.
